# Supplementary material for: Autophagy and Mitophagy-Related Pathways at the Crossroads of Genetic Pathways Involved in Familial Sarcoidosis and Host-Pathogen Interactions Induced by Coronaviruses
Source: Cells. 2021 Aug 5;10(8):1995. doi: 10.3390/cells10081995 (PMC8393644; doi:10.3390/cells10081995)
Supplement: Supplementary file 1 [file cells-10-01995-s001.zip]

Archive with 4 entries (4 files):
- Table S2 - Pacheco and al - Manuscript ID CELLS 1218790.xlsx
- Table S3 - Pacheco and al - Manuscript ID CELLS 1218790.xlsx
- Table S1 - Pacheco and al - Manuscript ID CELLS 1218790.xlsx
- Tables Descriptions.pdf
