# Supplementary material for: Autophagy and Mitophagy-Related Pathways at the Crossroads of Genetic Pathways Involved in Familial Sarcoidosis and Host-Pathogen Interactions Induced by Coronaviruses
Source: Cells. 2021 Aug 5;10(8):1995. doi: 10.3390/cells10081995 (PMC8393644; doi:10.3390/cells10081995)
Supplement: Supplementary file 1 [file cells-10-01995-s001.zip › Table S2 - Pacheco and al - Manuscript ID CELLS 1218790.xlsx]

## Sheet: Feuil1
TABLE S2	Genes of the control series crossing with the SARS-CoV2 GHI interactome
	ACRONYM DESCRIPTION	Brief functionnal description
AASS	Aminoadipate-Semialdehyde Synthase	Lysin metabolism
ABCC1	ATP Binding Cassette Subfamily C Member 1	ATPase coupled transporter activity
ACAD9	acyl-CoA dehydrogenase 9	Mitochondrial OXPHOS metabolism
ADAM9	ADAM Metallopeptidase Domain 9	Cell-matrix interactions
AKAP8	A-Kinase Anchoring Protein 8	Regulation of chromatin structural changes
AKAP9	A-Kinase Anchoring Protein 9	Regulation of chromatin structural changes
ALG8	Alpha-1,3-Glucosyltransferase	Protein glycosylation
BRD4	Bromodomain Containing 4	Histone acetyl transferase, c-Myc expression
CDK5RAP2	CDK5 Regulatory Subunit Associated Protein 2	Centrosomal attachment of gamma tubulin ring complex
CENPF	Centromere Protein F	Chromosome segregation, microtubular orientation
CENPT	Centromere Protein T	Chromosome segregation, microtubular orientation
CEP350	Centrosomal Protein 350	Chromosome segregation, microtubular orientation
CEP68	Centrosomal Protein 68	Chromosome segregation, microtubular orientation
CHPF2	Chondroitin Polymerizing Factor 2	Chondroitin sulfate biosynthesis
CLIP4	CAP-Gly Domain Containing Linker Protein Family Member 4	Microtubule organization
COLGALT1	Collagen Beta(1-O)Galactosyltransferase 1	Galactosylation of collagen
COMT	Catechol-O-Methyltransferase	Dopamine metabolism
COQ8B	Coenzyme Q8B	Mitochondrial inner membrane component
CSNK2B	casein kinase IIB	Kinase activity/Wnt signalling
CWC27	Spliceosome Associated Cyclophilin	pre-mRNA splicing
DCAKD	Dephospho-CoA Kinase Domain Containing	Coenzyme biosynthetic process
DDX10	DEAD-Box Helicase 10	ATP-dependant RNA helicase
DNAJC11	DNA J homolog subfamily C member 11	Mitochondrial outer membrane sorting assembly machinery (SAM) complex
EDEM3	Endoplasmic Reticulum Degradation Enhancing Alpha-Mannosidase Like Protein 3	Involved in endoplasmic reticulum-associated degradation (ERAD)
EXOSC3	Exosome Component 3	Non-catalytic component of the RNA exosome complex
EXOSC5	Exosome Component 5	Non-catalytic component of the RNA exosome complex
EXOSC8	Exosome Component 8	Non-catalytic component of the RNA exosome complex
FAM162A	Family With Sequence Similarity 162 Member A	Proposed to be involved in regulation of apoptosis
FAM8A1	Family With Sequence Similarity 8 Member A1	Ubiquitin-proteasome-dependent process of ER-associated degradation
FKBP10	FKBP Prolyl Isomerase 10	Accelerate the folding of proteins during protein synthesis
FKBP15	FKBP Prolyl Isomerase 15	Involved in the transport of early endosomes and cytoskeleton organization
FYCO1	FYVE And Coiled-Coil Domain Autophagy Adaptor 1	Regulation of autophagosome formation and vesicle transport
GGCX	Gamma-Glutamyl Carboxylase	Vitamin K dependant metabolism and blood coagulation
GHITM	Growth Hormone Inducible Transmembrane Protein	Required for the mitochondrial tubular network and cristae organization
GORASP1	Golgi Reassembly Stacking Protein 1	Role in assembly and membrane stacking of the Golgi cisternae
IL17RA	Interleukin 17 Receptor A	Major effector cytokines of innate and adaptive immune system
INTS4	Integrator Complex Subunit 4	Involved in the small nuclear RNAs (snRNA) U1 and U2 transcription
LARP1	La Ribonucleoprotein 1	Regulates the translation of specific target mRNA species downstream of the mTOR complex
LARP4B	La Ribonucleoprotein 4B	Positive regulation of 3'-UTR-mediated mRNA stabilization
MAP7D1	MAP7 Domain Containing 1	Involved in microtubule cytoskeleton organization
MARK3	Microtubule Affinity Regulating Kinase 3	Involved in the specific phosphorylation of microtubule-associated proteins for MAP2 and MAP4
MDN1	Midasin AAA ATPase 1	Nuclear chaperone required for maturation and nuclear export of pre-60S ribosome subunits
MFGE8	Milk Fat Globule EGF And Factor V/VIII Domain Containing	Role in the maintenance of intestinal epithelial homeostasis and mucosal healing
MOV10	Mov10 RISC Complex RNA Helicase	Required for microRNA (miRNA)-mediated gene silencing by the RNA-induced silencing complex
MPHOSPH10	M-Phase Phosphoprotein 10	Required for the early cleavages during pre-18S ribosomal RNA processing
MRPS27	Mitochondrial Ribosomal Protein S27	RNA-binding component of the mitochondrial small ribosomal subunit
MRPS5	Mitochondrial Ribosomal Protein S5	Mitochondrial translational elongation
MTCH1	Mitochondrial Carrier 1	Potential mitochondrial transporter. May play a role in apoptosis.
MYCBP2	MYC Binding Protein 2	Mediates ubiquitination of threonine and serine residues on target proteins
NINL	Ninein Like	Involved in the microtubule organization in interphase cells
NLRX1	NLR Family Member X1	Acts as a negative regulator of MAVS-mediated antiviral responses
NUP210	Nucleoporin 210	Nucleoporin essential for nuclear pore assembly and fusion
NUP98	Nucleoporin 98	Plays a role in the nuclear pore complex (NPC) assembly and/or maintenance
OS9	Endoplasmic Reticulum Lectin	Lectin which functions in endoplasmic reticulum (ER) quality control and ER-associated degradation
PCNT	Pericentrin	Integral component of the filamentous matrix of the centrosome involbed in mitosis
PCSK6	Proprotein Convertase Subtilisin/Kexin Type 6	Serine endoprotease that processes various proproteins mainly in the endocrine system
PIGO	Phosphatidylinositol Glycan Anchor Biosynthesis Class O	Ethanolamine phosphate transferase involved in glycosylphosphatidylinositol-anchor biosynthesis
PIGS	Phosphatidylinositol Glycan Anchor Biosynthesis Class S	Involved in the pathway glycosylphosphatidylinositol-anchor biosynthesis
PITRM1	Pitrilysin Metallopeptidase 1	Metalloendopeptidase of the mitochondrial matrix that functions in peptide cleavage and degradation
PKP2	Plakophilin 2	May play a role in junctional plaques
PLAT	Plasminogen Activator, Tissue Type	Converts the abundant, but inactive, zymogen plasminogen to plasmin
PLD3	Phospholipase D Family Member 3	Regulates inflammatory cytokine responses via the degradation of nucleic acids
PLOD2	Procollagen-Lysine,2-Oxoglutarate 5-Dioxygenase 2	Essential for the stability of the intermolecular collagen cross-links
PMPCA	Peptidase, Mitochondrial Processing Subunit Alpha	Substrate recognition and binding subunit of the essential mitochondrial processing protease
POGLUT3	Protein O-Glucosyltransferase 3	Protein glucosyltransferase, targets extracellular EGF repeats of proteins such as NOTCH1 and NOTCH3
POLA2	DNA polymerase alpha subunit 2	Accessory subunit of the DNA polymerase alpha complex, essential role in the initiation of DNA synthesis
PRKAR2A	Protein Kinase CAMP-Dependent Type II Regulatory Subunit Alpha	Regulatory subunit of the cAMP-dependent protein kinases involved in cAMP signaling in cells
PRRC2B	proline rich coiled-coil 2B	RNA binding protein involved in cell differentiation
PUSL1	Pseudouridine Synthase Like 1	Pseudouridine synthase activity
QSOX2	Quiescin Sulfhydryl Oxidase 2	Catalyzes the oxidation of sulfhydryl groups in peptide and protein thiols to disulfides
RAB1A	Ras-related protein Rab-1A	Regulators of intracellular membrane trafficking, vesicles transport and fusion with membranes
RBM28	RNA Binding Motif Protein 28	Nucleolar component of the spliceosomal ribonucleoprotein complexes
REEP6	Receptor Accessory Protein 6	In rod photoreceptors, facilitates stability and/or trafficking of guanylate cyclases
RPL36	Ribosomal Protein L36	Component of the large ribosomal subunit
RTN4	Reticulon 4	Required to induce the formation and stabilization of endoplasmic reticulum (ER) tubules
SCCPDH	Saccharopine dehydrogenase-like oxidoreductase.	Oxidoreductase activity involved in platelet degranulation
SIGMAR1	Sigma Non-Opioid Intracellular Receptor 1	Functions in lipid transport from the endoplasmic reticulum
SIL1	SIL1 Nucleotide Exchange Factor	Required for protein translocation and folding in the endoplasmic reticulum
SRP72	Signal Recognition Particle 72	Role in targeting secretory proteins to the rough endoplasmic reticulum membrane
STOML2	Stomatin Like 2	Mitochondrial protein that probably regulates the biogenesis and the activity of mitochondria
TARS2	Threonyl-TRNA Synthetase 2	Catalyzes the attachment of threonine to tRNA(Thr) in a two-step reaction
THTPA	Thiamine Triphosphatase	Hydrolase highly specific for thiamine triphosphate
TLE1	TLE Family Member 1	Corepressor that binds to a number of transcription factors. Inhibits NF-kappa-B-regulated gene expression
TOR1A	Torsin Family 1 Member A	Protein with chaperone functions important for the control of protein folding, processing, stability
TUBGCP2	Tubulin Gamma Complex Associated Protein 2	Gamma-tubulin complex is necessary for microtubule nucleation at the centrosome
TYSND1	Trypsin Like Peroxisomal Matrix Peptidase 1	Catalyzes the processing of PTS1-proteins involved in the peroxisomal beta-oxidation of fatty acids
UGGT2	UDP-Glucose Glycoprotein Glucosyltransferase 2	Recognizes glycoproteins with minor folding defects
UPF1	UPF1 RNA Helicase And ATPase	RNA-dependent helicase and ATPase required for nonsense-mediated decay (NMD) of mRNAs
USP13	Ubiquitin Specific Peptidase 13	Mediates deubiquitination of target proteins involved in autophagy and ER associated degradation
USP54	Ubiquitin Specific Peptidase 54	Involved in protein deubiquitination without protease activity
WASHC4	WASH Complex Subunit 4	Component of the WASH complex acting as nucleation-promoting factor (NPF) at the surface of endosomes
WFS1	Wolframin ER Transmembrane Glycoprotein	Participates in the regulation of cellular Ca2+ homeostasis in the endoplasmic reticulum
YIF1A	Yip1 Interacting Factor Homolog A	Possible role in transport between endoplasmic reticulum and Golgi
ZC3H18	Zinc Finger CCCH-Type Containing 18	mRNA cap binding complex binding, protein-macromolecule adaptor activity
ZNF318	Zinc Finger Protein 318	Acts as a transcriptional corepressor for androgen-receptor-mediated transactivation function
