# Supplementary material for: Autophagy and Mitophagy-Related Pathways at the Crossroads of Genetic Pathways Involved in Familial Sarcoidosis and Host-Pathogen Interactions Induced by Coronaviruses
Source: Cells. 2021 Aug 5;10(8):1995. doi: 10.3390/cells10081995 (PMC8393644; doi:10.3390/cells10081995)
Supplement: Supplementary file 1 [file cells-10-01995-s001.zip › Table S3 - Pacheco and al - Manuscript ID CELLS 1218790.xlsx]

## Sheet: Feuil1
Gene	Variant	Exon	EFFECT	TYPE	ACCESSION	cDNA	Polyphen	CADD	M/Taster	MAF	DEPTH	Family
ACAD9	rs1367981102	4	p.Phe120SerfsTer9	FS	NM_014049.4	c.359delT	Pathogenic?	20+?	nd	0.0001042	68	F6
YIF1A	rs764089063	1	p.Tyr7His	MS	NM_020470.2	c.19T>C	0.894 / P	24	1-160	0.00005645	43	F7
PITRM1	rs33996077	3	p.Gln59HisfsTer25	FS	NM_001242309	c.176_177ins25	Pathogenic?	20+?	nd	unknown	25	F12
FASTKD5	rs41304800	2	p.Ile380Arg	MS	NM_021826.4	c.1139T>G	0.564 / P	24	0.96-0.97	0.03149	119	F7
STOM	rs41273438	7	p.Met275Thr	MS	NM_004099.5	c.824T>C	0.03	23.9	0.99-81	0.02845	57	F10
AASS	rs74882337	16	p.Pro560Ser	MS	NM_005763.3	c.1678C>T	0.901 / P	25	1974-01-01	0.003935	89	F11
EMC1	rs141614470	7	p.Pro240Leu	MS	NM_015047.2	c.719C>T	0.062	20	0-94	0.002231	101	F6
PUSL1	rs34738574	5	p.Arg197Trp	MS	NM_153339.1	c.589C>T 1	0.733	10	0.84-101	0.0169	148	F6
PLD3	nd	11	p.Ala382Gly	MS	NM_012268.3	c.1145C>G	Mutation?	nd	1960-01-01	nd	159	F11
SDF2	rs147826873	3	p.Met191Thr	MS	NM_006923.3	c.572T>C	0.725	28	1981-01-01	0.0008875	51	F6
IL17RA	rs140221307	11	p.Trp320Arg	MS	NM_014339.6	c.958T>C	0.972	26	0.99-101	0.001801	22	F4
GDF15	rs1468539589	2	p.Ala277Thr	MS	NM_004864.2	c.829G>A	0.445	22	0.94-58	0.00001236	138	F11
PLAT	rs151006962	10	p.Arg310Cys	MS	NM_000930.3	c.685G>A	0.925	24.5	0.93-180	0.0005566	102	F5
FKBP10	rs782027232	3	p.Arg178Cys	MS	NM_021939.3	c.532C>T	1	31	0.94-180	0.00003192	98	F13
ADAM9	rs113649109	8	p.Ala234Val	MS	NM_003816.2	c.701C>T	0.975	23.7	1964-01-01	0.01417	124	F13
PDE4DIP	rs111880480	38	p.Asn2065Lys	MS	NM_001198834.3	c.6195C>A	0.999	23.4	0.89-94	0.01197	60	F6+F8
GOLGA2	rs41276654	22	p.Arg762Ser	MS	NM_004486.4	c.2286G>C	0.895	22.4	0-110	0.02821	65	F6+F8
GOLGA3	rs76213047	4	p.Ser81Cys	MS	NM_005895.3	c.242C>G	0.623	23	0.86-112	0.008629	230	F6
GOLGB1	rs147340438	4	p.Gln117Lys	MS	NM_001256486.1	c.349C>A	0.979	22.3	1953-01-01	0.001824	64	F10
FYCO1	nd	8	p.Gln994Lys	MS	NM_024513.3	c.2977C>A	Mutation?	nd	0.99-53	nd	165	F10
FYCO1	rs140002692	8	p.Ser216Phe	MS	NM_024513.3	c.647C>T	0.963	23	0.94-153	0.001202	104	F13
TBK1	rs141727722	18	p.Thr651_Asn	IF-DEL	NM_013254.3	c.1953_1955delTAA	Pathogenic?	nd	nd	0.0003841	74	F1
ECSIT	rs34803265	4	p.Arg64Cys	MS	NM_001142465.2	c.190C>T	0.736	19	0.99/ 180	0.04719	50	F11
NLRX1	rs150153921	5	p.Leu193Val	MS	NM_001282358.1	c.577C>G	0.836	23.3	1932-01-01	0.005398	101	F13
EXOSC2	rs373884838	7	p.Tyr206His	MS	NM_014285.5	c.616T>C	0.566	21	0.99-80	0.00002493	76	F5
BRD4	rs1265135334	8	p.Ser494Leu	MS	NM_014299.2	c.1481C>T	0.988	29	0,002-145	0.000004518	64	F12
ZDHHC5	rs748917437	11	p.Ala460Val	MS	NM_015457.2	c.1379C>T	0.001	19.5	1964-01-01	0.000007954	112	F7
HS2ST1	nd	6	p.Thr254Ile	MS	NM_012262.3	c.761C>T	Mutation?	nd	1989-01-01	nd	100	F7
DNAJC11	rs41278034	12	p.Asp430Asn	MS	NM_018198.3	c.1288G>A	0.454	22	2023-01-01	0.0117	69	F9
VPS11	rs782375642	7	p.Gly386Val	MS	NM_021729.4	c.1157G>T	Mutation?	nd	nd	0.00001605	54	F11
TYSND1	rs148847065	3	p.Val461Met	MS	NM_173555.3	c.1381G>A	0.985	24.8	2021-01-01	0.0009503	105	F13
